# Supplementary material for: Investigation of the Impact from IL-2, IL-7, and IL-15 on the Growth and Signaling of Activated CD4+ T Cells
Source: PubMed Central journal article supplement (PMC7659484; doi:10.3390/ijms21217814), 2020-10-22
Supplement: ijms-21-07814-s001.pdf [file ijms-21-07814-s001.pdf]

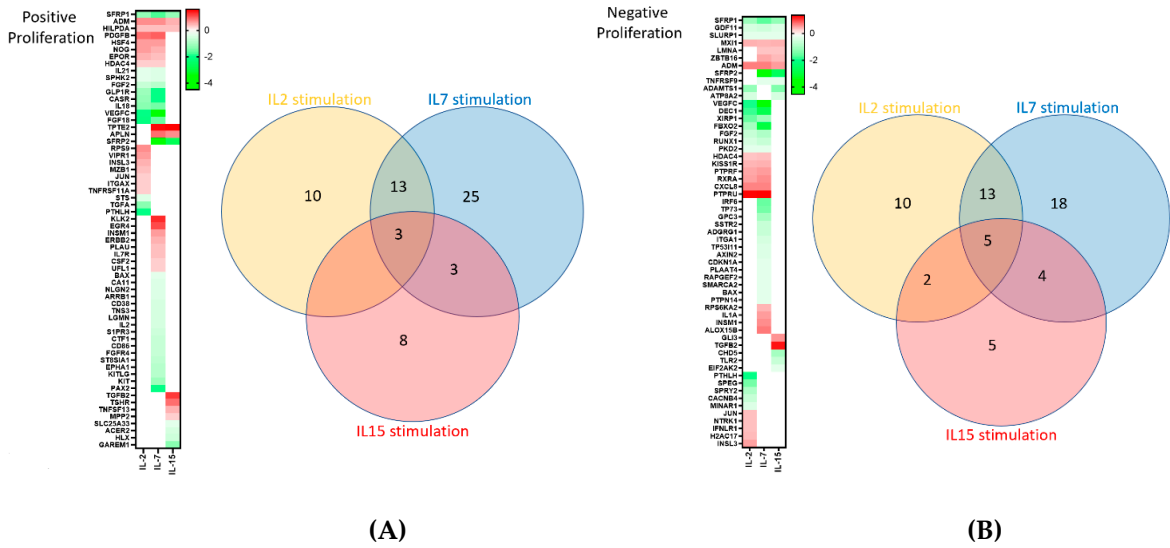

**Figure 1.** Significantly changed transcripts associated with proliferation related ontology vs. the control condition: (A) positive proliferation and (B) negative proliferation.

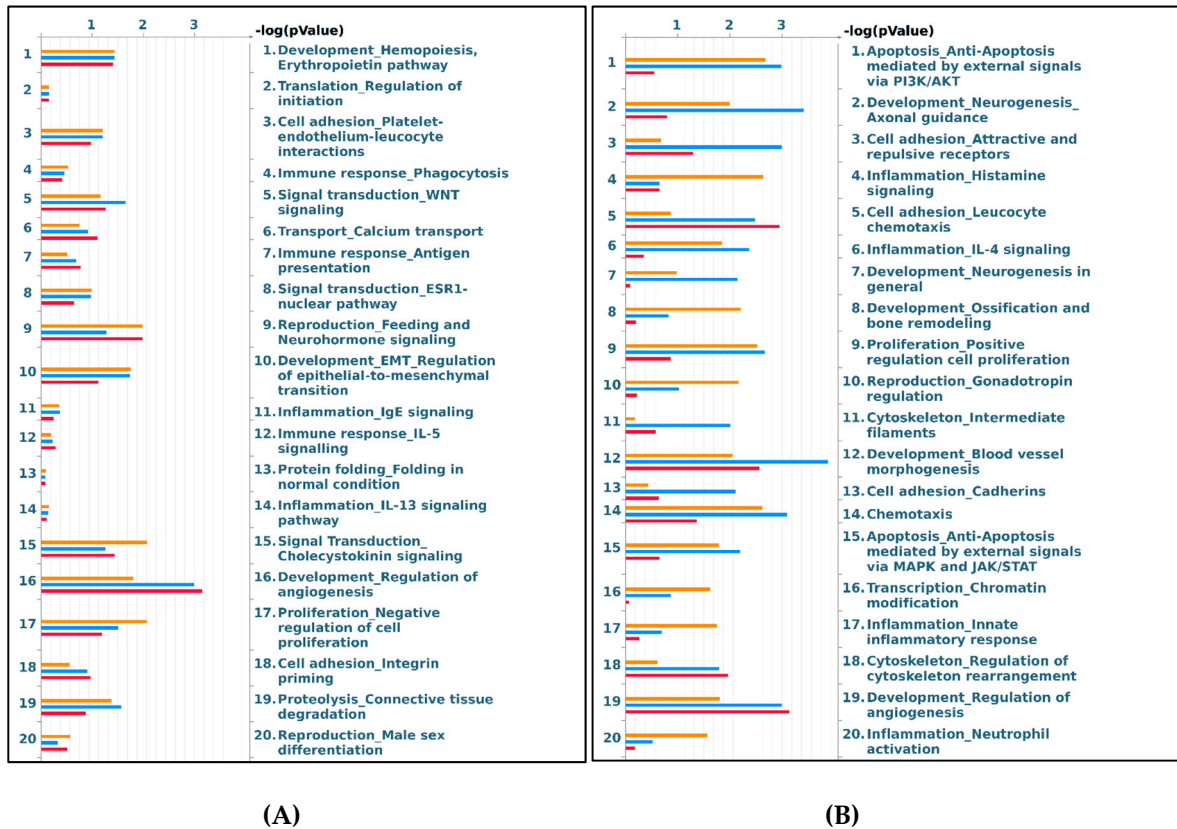

**Figure 2.** The most statistically affected genetic networks either shared (Supplementary Figure S2A) or uniquely changed (Supplementary Figure S2B) between conditions: orange for IL2, blue for IL7, and red for IL15.
